# Supplementary material
Source: PubMed Central journal article supplement (PMC2042204)

% compared to Wt @ 0 hrs

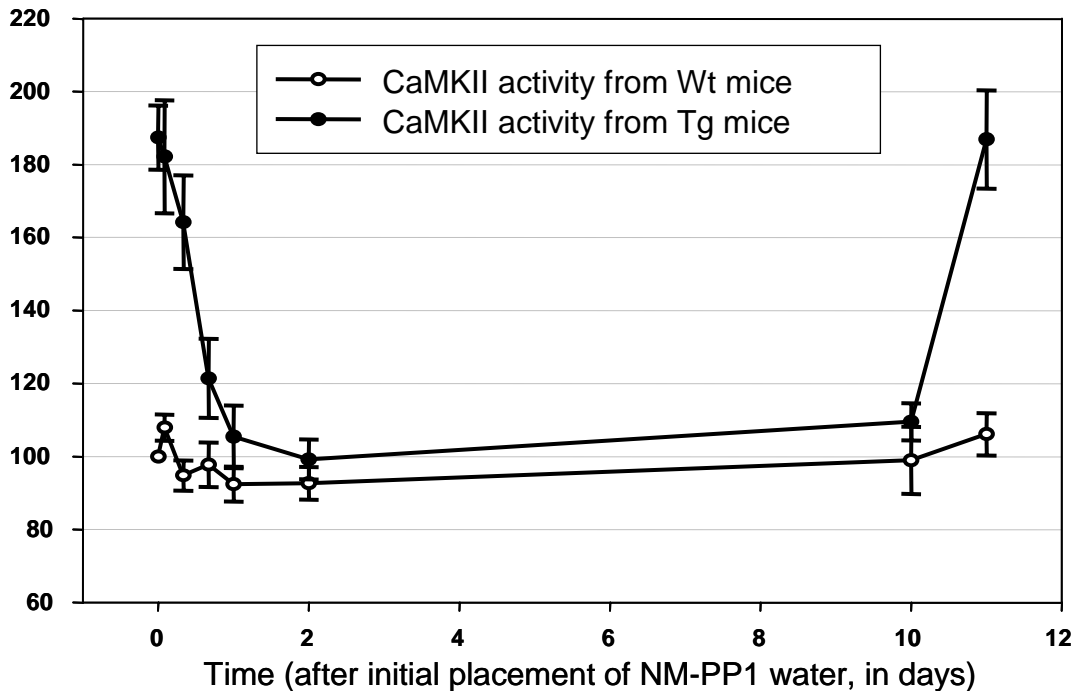

Supplement: pnas_0703344104_1.pdf [file pnas_0703344104_1.pdf]
